# Supplementary material for: MOF-templated controllable synthesis of α-Fe2O3 porous nanorods and their gas sensing properties
Source: Royal Society of Chemistry journal article supplement (doi:10.1039/c6ra21567j), 2016-01-01
Supplement: c6ra21567j1.pdf [file c6ra21567j1.pdf]

## Supporting Information

### **MOF-templated controllable synthesis of $\alpha$ -Fe<sub>2</sub>O<sub>3</sub> porous nanorods and its gas sensing properties**

Pingyi Gao,<sup>a</sup> Rong Liu,<sup>a</sup> Huihan Huang,<sup>a</sup> Xiao Jia,<sup>\*a</sup> and Haibo Pan<sup>\*ab</sup>

*<sup>a</sup>College of Chemistry, Fuzhou University, Fuzhou, Fujian 350116, P. R. China*

*<sup>b</sup>Fujian Key Lab of Medical Instrument and Pharmaceutical Technology, Fuzhou University, Fuzhou, Fujian 350002, P. R.China*

\*Corresponding authors

Tel.: +86-591-83758209; Fax:+86-591-87892632

*E-mail address:* [jiaxiao@fzu.edu.cn](mailto:jiaxiao@fzu.edu.cn), [hspan@fzu.edu.cn](mailto:hspan@fzu.edu.cn).

Fig. S1

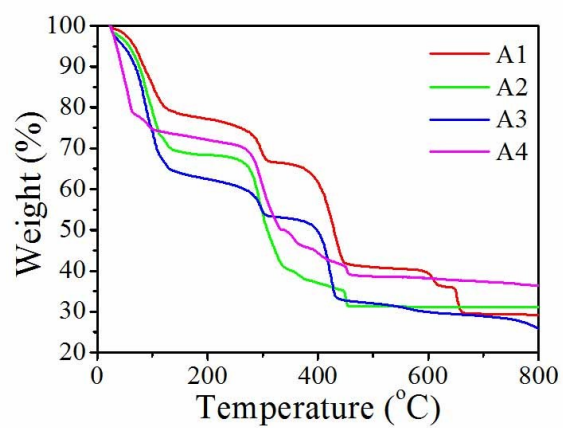

Fig. S1. TGA of as-prepared MIL-88A1-A4 under N<sub>2</sub>.

Fig. S2

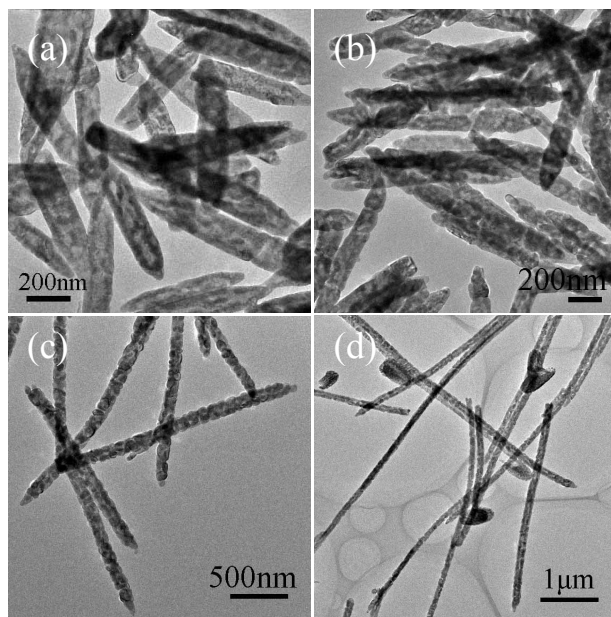

Fig. S2. TEM images of the samples. (a) S1, (b) S2, (c) S3, and (d) S4.

Fig. S3

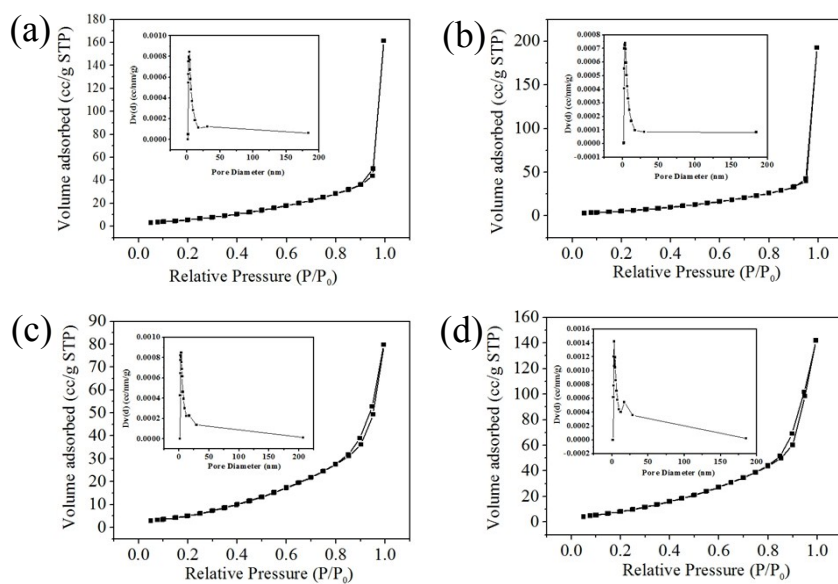

Fig. S3. Nitrogen adsorption-desorption isotherms and the corresponding pore size distribution curves (inset) of the as-prepared samples. (a) S1, (b) S2, (c) S3 and (d) S4.

Fig. S4

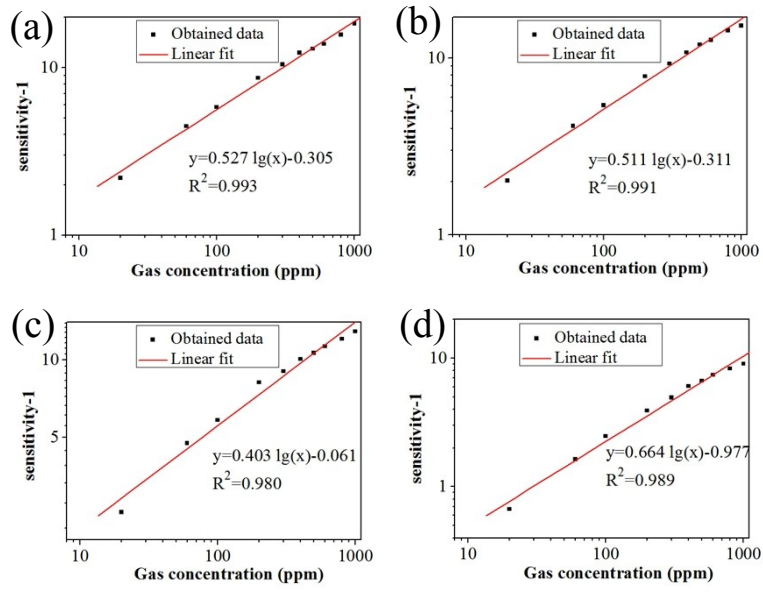

Fig. S4. Plots of  $\log(K-1)$  versus  $\log C$  for the samples S1-S4 sensors to different concentrations of acetone gas. (a) S1, (b) S2, (c) S3, and (d) S4.
